# Supplementary material for: Common neural structures activated by epidural and transcutaneous lumbar spinal cord stimulation: Elicitation of posterior root-muscle reflexes
Source: PubMed Central journal article supplement (PMC5790266; doi:10.1371/journal.pone.0192013), 2018-01-30
Supplement: pone.0192013.s002.pdf [file pone.0192013.s002.pdf]

**S1 Table. Average latencies and peak-to-peak amplitudes ( $\pm$  SE) of responses to single-pulse transcutaneous as well as 2-Hz epidural spinal cord stimulation applied with respective common threshold intensities.**

|                                            | <b>Rectus femoris</b> | <b>Biceps femoris</b> | <b>Tibialis anterior</b> | <b>Triceps surae</b> |
|--------------------------------------------|-----------------------|-----------------------|--------------------------|----------------------|
| <b><i>Onset latencies (ms)</i></b>         |                       |                       |                          |                      |
| tSCS                                       | 9.8 $\pm$ 0.4         | 11.0 $\pm$ 0.3        | 18.7 $\pm$ 0.4           | 19.8 $\pm$ 0.4       |
| eSCS                                       | 9.6 $\pm$ 0.3         | 10.9 $\pm$ 0.2        | 18.5 $\pm$ 0.3           | 18.2 $\pm$ 0.3       |
| <b><i>Offsets (ms)</i></b>                 |                       |                       |                          |                      |
| tSCS                                       | 33.2 $\pm$ 1.6        | 40.7 $\pm$ 0.7        | 40.5 $\pm$ 1.3           | 37.8 $\pm$ 0.9       |
| eSCS                                       | 35.9 $\pm$ 1.2        | 37.8 $\pm$ 1.1        | 37.7 $\pm$ 1.6           | 36.2 $\pm$ 1.4       |
| <b><i>Response durations (ms)</i></b>      |                       |                       |                          |                      |
| tSCS                                       | 23.1 $\pm$ 1.4        | 29.5 $\pm$ 0.8        | 22.0 $\pm$ 1.6           | 18.0 $\pm$ 0.8       |
| eSCS                                       | 26.3 $\pm$ 1.3        | 27.2 $\pm$ 1.1        | 19.5 $\pm$ 1.5           | 19.0 $\pm$ 1.4       |
| <b><i>Peak-to-peak amplitudes (mV)</i></b> |                       |                       |                          |                      |
| tSCS                                       | 1.6 $\pm$ 0.4         | 2.0 $\pm$ 0.4         | 0.8 $\pm$ 0.2            | 3.0 $\pm$ 0.5        |
| eSCS, 0–3+                                 | 1.6 $\pm$ 0.4         | 1.7 $\pm$ 0.3         | 0.5 $\pm$ 0.1            | 1.3 $\pm$ 0.3        |
| eSCS, 0+3–                                 | 1.0 $\pm$ 0.4         | 1.8 $\pm$ 0.3         | 0.7 $\pm$ 0.1            | 1.5 $\pm$ 0.3        |

eSCS, epidural spinal cord stimulation; tSCS, transcutaneous spinal cord stimulation; 0–3+, most rostral cathode site along the epidural array; 0+3–, most caudal cathode site. Note that for the calculation of onset and offset latencies as well as the response durations, data obtained with both bipolar electrode combinations of epidural SCS were pooled.
