# Supplementary material for: Common neural structures activated by epidural and transcutaneous lumbar spinal cord stimulation: Elicitation of posterior root-muscle reflexes
Source: PubMed Central journal article supplement (PMC5790266; doi:10.1371/journal.pone.0192013), 2018-01-30
Supplement: pone.0192013.s003.pdf [file pone.0192013.s003.pdf]

**S2 Table. Individual latencies and peak-to-peak amplitudes (mean  $\pm$  SD) of responses to single-pulse transcutaneous spinal cord stimulation applied with respective common threshold intensities.**

| Subject                                            | Rectus femoris     | Biceps femoris     | Tibialis anterior | Triceps surae       |
|----------------------------------------------------|--------------------|--------------------|-------------------|---------------------|
| <i>Onset latencies (ms)</i>                        |                    |                    |                   |                     |
| 1                                                  | 11.9 $\pm$ 0.5     | 12.3 $\pm$ 0.6     | 19.7 $\pm$ 0.7    | 21.7 $\pm$ 0.5      |
| 2                                                  | 10.0 $\pm$ 0.2     | 11.4 $\pm$ 0.3     | 18.6 $\pm$ 1.0    | 20.6 $\pm$ 0.8      |
| 3                                                  | 10.1 $\pm$ 0.2     | 11.6 $\pm$ 0.1     | 17.7 $\pm$ 1.2    | 21.6 $\pm$ 0.6      |
| 4                                                  | 10.0 $\pm$ 0.3     | 11.5 $\pm$ 0.1     | 21.5 $\pm$ 0.6    | 20.0 $\pm$ 0.7      |
| 5                                                  | 9.5 $\pm$ 0.2      | 10.1 $\pm$ 0.5     | 19.0 $\pm$ 0.6    | 19.3 $\pm$ 0.4      |
| 6                                                  | 9.2 $\pm$ 0.7      | 10.3 $\pm$ 0.6     | 19.1 $\pm$ 0.3    | 18.5 $\pm$ 0.1      |
| 7                                                  | 7.4 $\pm$ 0.1      | 9.8 $\pm$ 0.1      | 16.2 $\pm$ 0.1    | 18.6 $\pm$ 0.8      |
| 8                                                  | 10.3 $\pm$ 0.2     | 11.5 $\pm$ 0.1     | 18.9 $\pm$ 0.1    | 20.3 $\pm$ 0.8      |
| 9                                                  | 9.6 $\pm$ 0.9      | 10.3 $\pm$ 0.3     | 18.2 $\pm$ 0.9    | 18.1 $\pm$ 0.4      |
| 10                                                 | 10.1 $\pm$ 0.5     | 11.5 $\pm$ 1.2     | 17.7 $\pm$ 0.4    | 18.9 $\pm$ 0.2      |
| <i>Offsets (ms)</i>                                |                    |                    |                   |                     |
| 1                                                  | 38.1 $\pm$ 4.7     | 37.8 $\pm$ 5.3     | 44.8 $\pm$ 4.9    | 40.2 $\pm$ 5.2      |
| 2                                                  | 28.6 $\pm$ 2.6     | 38.4 $\pm$ 3.7     | 44.9 $\pm$ 4.8    | 37.1 $\pm$ 5.5      |
| 3                                                  | 33.6 $\pm$ 0.6     | 41.6 $\pm$ 3.2     | 45.9 $\pm$ 3.7    | 36.7 $\pm$ 2.1      |
| 4                                                  | 37.5 $\pm$ 5.1     | 43.2 $\pm$ 5.5     | 36.8 $\pm$ 3.5    | 40.3 $\pm$ 4.2      |
| 5                                                  | 33.4 $\pm$ 1.2     | 39.7 $\pm$ 4.6     | 40.5 $\pm$ 3.9    | 36.0 $\pm$ 4.7      |
| 6                                                  | 26.7 $\pm$ 2.8     | 42.8 $\pm$ 4.1     | 34.5 $\pm$ 4.7    | 37.6 $\pm$ 3.8      |
| 7                                                  | 26.9 $\pm$ 4.0     | 39.2 $\pm$ 4.3     | 41.9 $\pm$ 1.6    | 32.2 $\pm$ 3.6      |
| 8                                                  | 41.0 $\pm$ 4.5     | 39.1 $\pm$ 3.0     | 41.3 $\pm$ 0.6    | 42.1 $\pm$ 4.8      |
| 9                                                  | 35.4 $\pm$ 3.6     | 42.1 $\pm$ 4.0     | 38.7 $\pm$ 3.4    | 37.3 $\pm$ 3.0      |
| 10                                                 | 30.4 $\pm$ 1.5     | 43.5 $\pm$ 1.4     | 35.6 $\pm$ 3.8    | 38.2 $\pm$ 0.4      |
| <i>Response durations (ms)</i>                     |                    |                    |                   |                     |
| 1                                                  | 25.8 $\pm$ 4.0     | 25.6 $\pm$ 4.9     | 27.4 $\pm$ 6.1    | 18.5 $\pm$ 5.4      |
| 2                                                  | 18.6 $\pm$ 2.7     | 27.1 $\pm$ 3.7     | 26.3 $\pm$ 4.1    | 16.5 $\pm$ 5.1      |
| 3                                                  | 23.5 $\pm$ 0.7     | 30.0 $\pm$ 3.1     | 28.7 $\pm$ 4.2    | 14.9 $\pm$ 1.7      |
| 4                                                  | 27.5 $\pm$ 5.9     | 31.7 $\pm$ 5.5     | 14.5 $\pm$ 4.5    | 20.5 $\pm$ 5.2      |
| 5                                                  | 23.9 $\pm$ 1.1     | 29.6 $\pm$ 5.3     | 21.5 $\pm$ 3.8    | 16.7 $\pm$ 5.1      |
| 6                                                  | 15.8 $\pm$ 2.5     | 32.6 $\pm$ 4.5     | 15.4 $\pm$ 4.9    | 19.1 $\pm$ 3.7      |
| 7                                                  | 19.5 $\pm$ 4.0     | 26.5 $\pm$ 4.5     | 25.8 $\pm$ 1.6    | 13.6 $\pm$ 3.3      |
| 8                                                  | 30.7 $\pm$ 4.7     | 27.6 $\pm$ 3.0     | 22.4 $\pm$ 0.5    | 21.2 $\pm$ 4.9      |
| 9                                                  | 25.8 $\pm$ 3.5     | 31.8 $\pm$ 5.9     | 20.5 $\pm$ 4.0    | 19.2 $\pm$ 3.1      |
| 10                                                 | 20.3 $\pm$ 1.0     | 32.0 $\pm$ 2.4     | 17.9 $\pm$ 3.8    | 19.4 $\pm$ 0.4      |
| <i>Peak-to-peak amplitudes (<math>\mu</math>V)</i> |                    |                    |                   |                     |
| 1                                                  | 1451.0 $\pm$ 388.6 | 2688.7 $\pm$ 262.8 | 830.3 $\pm$ 174.4 | 3541.9 $\pm$ 461.3  |
| 2                                                  | 688.2 $\pm$ 222.6  | 1336.2 $\pm$ 209.9 | 322.6 $\pm$ 81.1  | 1538.7 $\pm$ 271.1  |
| 3                                                  | 1510.6 $\pm$ 511.7 | 3640.9 $\pm$ 682.4 | 160.8 $\pm$ 27.9  | 2381.2 $\pm$ 769.1  |
| 4                                                  | 2673.6 $\pm$ 232.4 | 1823.9 $\pm$ 378.5 | 970.9 $\pm$ 452.0 | 1978.6 $\pm$ 594.1  |
| 5                                                  | 1898.1 $\pm$ 522.5 | 1078.2 $\pm$ 195.5 | 535.3 $\pm$ 115.2 | 4358.9 $\pm$ 1040.8 |

|    |                    |                    |                    |                    |
|----|--------------------|--------------------|--------------------|--------------------|
| 6  | $386.7 \pm 230.3$  | $595.6 \pm 197.5$  | $1407.4 \pm 379.0$ | $4202.7 \pm 769.3$ |
| 7  | $636.0 \pm 233.2$  | $1053.9 \pm 297.0$ | $333.8 \pm 29.9$   | $252.2 \pm 61.4$   |
| 8  | $4372.4 \pm 512.0$ | $4634.7 \pm 113.1$ | $1796.9 \pm 120.1$ | $2801.7 \pm 726.0$ |
| 9  | $1544.1 \pm 911.9$ | $1867.5 \pm 387.1$ | $970.8 \pm 514.9$  | $4279.5 \pm 783.5$ |
| 10 | $523.0 \pm 140.1$  | $1453.4 \pm 517.1$ | $899.5 \pm 154.6$  | $4866.4 \pm 626.4$ |

---
