# Supplementary material for: Common neural structures activated by epidural and transcutaneous lumbar spinal cord stimulation: Elicitation of posterior root-muscle reflexes
Source: PubMed Central journal article supplement (PMC5790266; doi:10.1371/journal.pone.0192013), 2018-01-30
Supplement: pone.0192013.s004.pdf [file pone.0192013.s004.pdf]

**S3 Table. Individual latencies and peak-to-peak amplitudes (mean  $\pm$  SD) of responses to 2-Hz epidural spinal cord stimulation applied with respective common threshold intensities.**

| Subject                                                                                                  | Rectus femoris     | Biceps femoris     | Tibialis anterior  | Triceps surae      |
|----------------------------------------------------------------------------------------------------------|--------------------|--------------------|--------------------|--------------------|
| <i>Onset latencies (ms)</i>                                                                              |                    |                    |                    |                    |
| 8                                                                                                        | 10.9 $\pm$ 0.9     | 10.9 $\pm$ 0.4     | 17.4 $\pm$ 0.4     | 18.9 $\pm$ 1.1     |
| 9                                                                                                        | 9.0 $\pm$ 0.3      | 10.2 $\pm$ 0.4     | 18.1 $\pm$ 0.3     | 18.2 $\pm$ 0.6     |
| 10                                                                                                       | 10.6 $\pm$ 0.5     | 11.0 $\pm$ 0.9     | 19.0 $\pm$ 0.9     | 18.4 $\pm$ 0.5     |
| 11                                                                                                       | 9.7 $\pm$ 0.3      | 11.7 $\pm$ 1.2     | 18.7 $\pm$ 0.5     | 19.7 $\pm$ 0.2     |
| 12                                                                                                       | 10.0 $\pm$ 0.1     | 10.6 $\pm$ 0.3     | 18.5 $\pm$ 0.5     | 17.2 $\pm$ 0.5     |
| 13                                                                                                       | 9.0 $\pm$ 0.6      | 10.6 $\pm$ 0.9     | 18.2 $\pm$ 0.7     | 17.0 $\pm$ 0.5     |
| 14                                                                                                       | 9.0 $\pm$ 0.3      | 9.9 $\pm$ 0.3      | 18.8 $\pm$ 0.9     | 17.9 $\pm$ 0.6     |
| 15                                                                                                       | 9.9 $\pm$ 0.4      | 11.2 $\pm$ 0.8     | 19.8 $\pm$ 0.3     | 19.2 $\pm$ 0.3     |
| 16                                                                                                       | 9.8 $\pm$ 0.3      | 11.8 $\pm$ 0.4     | 19.4 $\pm$ 0.7     | 18.0 $\pm$ 0.4     |
| 17                                                                                                       | 8.1 $\pm$ 1.0      | 10.6 $\pm$ 0.2     | 17.3 $\pm$ 0.4     | 17.0 $\pm$ 0.8     |
| <i>Offsets (ms)</i>                                                                                      |                    |                    |                    |                    |
| 8                                                                                                        | 37.3 $\pm$ 1.4     | 36.5 $\pm$ 3.6     | 40.7 $\pm$ 2.1     | 42.5 $\pm$ 1.5     |
| 9                                                                                                        | 36.0 $\pm$ 5.0     | 32.7 $\pm$ 4.5     | 34.5 $\pm$ 4.9     | 30.3 $\pm$ 4.2     |
| 10                                                                                                       | 38.1 $\pm$ 4.7     | 37.4 $\pm$ 4.9     | 31.4 $\pm$ 2.3     | 34.9 $\pm$ 4.3     |
| 11                                                                                                       | 30.3 $\pm$ 3.5     | 34.7 $\pm$ 5.7     | 43.5 $\pm$ 3.5     | 28.8 $\pm$ 1.5     |
| 12                                                                                                       | 28.4 $\pm$ 0.8     | 41.9 $\pm$ 2.2     | 35.1 $\pm$ 3.0     | 37.4 $\pm$ 3.4     |
| 13                                                                                                       | 36.1 $\pm$ 3.3     | 39.8 $\pm$ 2.8     | 30.7 $\pm$ 2.7     | 33.2 $\pm$ 2.4     |
| 14                                                                                                       | 39.3 $\pm$ 2.1     | 34.6 $\pm$ 4.4     | 39.1 $\pm$ 4.9     | 41.4 $\pm$ 5.2     |
| 15                                                                                                       | 34.5 $\pm$ 2.8     | 36.5 $\pm$ 2.2     | 44.8 $\pm$ 1.3     | 39.6 $\pm$ 2.9     |
| 16                                                                                                       | 38.7 $\pm$ 5.3     | 42.7 $\pm$ 0.9     | 42.2 $\pm$ 3.3     | 36.3 $\pm$ 3.7     |
| 17                                                                                                       | 39.9 $\pm$ 4.4     | 40.7 $\pm$ 5.2     | 35.1 $\pm$ 4.3     | 37.6 $\pm$ 4.0     |
| <i>Response durations (ms)</i>                                                                           |                    |                    |                    |                    |
| 8                                                                                                        | 26.5 $\pm$ 1.4     | 25.8 $\pm$ 4.1     | 24.1 $\pm$ 3.3     | 23.6 $\pm$ 2.1     |
| 9                                                                                                        | 27.0 $\pm$ 4.9     | 23.1 $\pm$ 5.5     | 17.3 $\pm$ 5.9     | 21.9 $\pm$ 5.4     |
| 10                                                                                                       | 27.5 $\pm$ 5.3     | 26.4 $\pm$ 5.6     | 12.7 $\pm$ 3.2     | 16.6 $\pm$ 4.7     |
| 11                                                                                                       | 20.5 $\pm$ 3.6     | 23.1 $\pm$ 5.7     | 25.8 $\pm$ 5.9     | 9.1 $\pm$ 2.8      |
| 12                                                                                                       | 18.4 $\pm$ 0.7     | 31.3 $\pm$ 2.4     | 16.7 $\pm$ 2.7     | 20.2 $\pm$ 3.0     |
| 13                                                                                                       | 27.1 $\pm$ 3.5     | 29.1 $\pm$ 3.2     | 12.5 $\pm$ 2.7     | 16.2 $\pm$ 2.7     |
| 14                                                                                                       | 30.4 $\pm$ 2.0     | 24.7 $\pm$ 4.3     | 20.7 $\pm$ 6.0     | 23.4 $\pm$ 5.6     |
| 15                                                                                                       | 24.7 $\pm$ 2.8     | 25.3 $\pm$ 2.7     | 25.0 $\pm$ 1.2     | 20.5 $\pm$ 3.0     |
| 16                                                                                                       | 28.9 $\pm$ 5.0     | 30.8 $\pm$ 0.9     | 22.8 $\pm$ 3.2     | 18.3 $\pm$ 3.8     |
| 17                                                                                                       | 31.8 $\pm$ 4.3     | 32.6 $\pm$ 5.1     | 17.3 $\pm$ 4.6     | 19.8 $\pm$ 5.2     |
| <i>Peak-to-peak amplitudes (<math>\mu</math>V), rostral cathode site along the epidural array (0–3+)</i> |                    |                    |                    |                    |
| 8                                                                                                        | 2953.3 $\pm$ 322.2 | 1646.6 $\pm$ 98.5  | 138.3 $\pm$ 95.9   | 910.1 $\pm$ 228.9  |
| 9                                                                                                        | 872.2 $\pm$ 193.8  | 476.1 $\pm$ 200.5  | 95.7 $\pm$ 13.1    | 112.4 $\pm$ 24.1   |
| 10                                                                                                       | 177.2 $\pm$ 42.1   | 1178.5 $\pm$ 222.5 | 499.0 $\pm$ 310.9  | 558.7 $\pm$ 217.2  |
| 11                                                                                                       | 3027.9 $\pm$ 606.1 | 2154.6 $\pm$ 311.6 | 521.2 $\pm$ 108.0  | 1115.9 $\pm$ 221.7 |
| 12                                                                                                       | 3471.9 $\pm$ 226.5 | 2872.0 $\pm$ 150.5 | 751.0 $\pm$ 193.7  | 2360.1 $\pm$ 470.6 |
| 13                                                                                                       | 922.2 $\pm$ 494.7  | 2462.2 $\pm$ 156.4 | 1210.6 $\pm$ 158.7 | 2634.3 $\pm$ 311.5 |

|    |                |                |                |                |
|----|----------------|----------------|----------------|----------------|
| 14 | 352.9 ± 197.9  | 467.3 ± 162.9  | 256.2 ± 88.5   | 542.9 ± 51.4   |
| 15 | 1885.3 ± 101.7 | 2017.0 ± 580.2 | 453.1 ± 177.4  | 1042.2 ± 420.0 |
| 16 | 1625.2 ± 527.6 | 2657.0 ± 547.1 | 1025.1 ± 444.6 | 2966.9 ± 112.7 |
| 17 | 336.1 ± 26.0   | 710.6 ± 53.4   | 213.1 ± 48.1   | 394.2 ± 92.8   |

---

***Peak-to-peak amplitudes (μV), caudal cathode site along the epidural array (0+3-)***

|    |                |                |                |                |
|----|----------------|----------------|----------------|----------------|
| 8  | 1032.1 ± 210.2 | 1952.2 ± 125.6 | 223.6 ± 105.9  | 1474.7 ± 231.6 |
| 9  | 106.6 ± 37.2   | 532.1 ± 319.5  | 592.8 ± 306.1  | 526.2 ± 195.7  |
| 10 | 138.8 ± 12.1   | 1812.0 ± 625.4 | 641.9 ± 180.7  | 1312.5 ± 432.2 |
| 11 | 2962.2 ± 77.3  | 2188.0 ± 189.4 | 534.3 ± 223.2  | 552.0 ± 419.3  |
| 12 | 4116.5 ± 76.4  | 2760.9 ± 278.3 | 914.0 ± 174.7  | 2259.1 ± 465.0 |
| 13 | 373.0 ± 216.0  | 1550.5 ± 266.0 | 1654.0 ± 337.3 | 2862.7 ± 147.8 |
| 14 | 326.8 ± 101.0  | 910.8 ± 236.7  | 475.6 ± 88.1   | 2153.8 ± 342.6 |
| 15 | 99.0 ± 17.5    | 1716.4 ± 276.0 | 597.6 ± 57.6   | 1218.2 ± 442.8 |
| 16 | 250.1 ± 92.8   | 3504.3 ± 351.3 | 896.3 ± 366.8  | 2446.1 ± 191.6 |
| 17 | 125.2 ± 23.7   | 727.8 ± 110.6  | 493.4 ± 201.2  | 473.7 ± 127.0  |

---
