# Supplementary material for: Common neural structures activated by epidural and transcutaneous lumbar spinal cord stimulation: Elicitation of posterior root-muscle reflexes
Source: PubMed Central journal article supplement (PMC5790266; doi:10.1371/journal.pone.0192013), 2018-01-30
Supplement: pone.0192013.s005.pdf [file pone.0192013.s005.pdf]

**S4 Table. Threshold intensities to evoke EMG responses with peak-to-peak amplitudes  $\geq 100$   $\mu\text{V}$  in lower-limb muscles, individually normalized to the lowest threshold across muscles.**

| <b>Subject</b>                                                                     | <b>RRF</b> | <b>LRF</b> | <b>RBF</b> | <b>LBF</b> | <b>RTA</b> | <b>LTA</b> | <b>RTS</b> | <b>LTS</b> |
|------------------------------------------------------------------------------------|------------|------------|------------|------------|------------|------------|------------|------------|
| <i>Transcutaneous spinal cord stimulation</i>                                      |            |            |            |            |            |            |            |            |
| 1                                                                                  | 1.3        | 1.4        | 1.0        | 1.0        | 1.3        | 1.0        | 1.2        | 1.0        |
| 2                                                                                  | 1.3        | 1.1        | 1.6        | 1.0        | 1.8        | 1.1        | 1.3        | 1.2        |
| 3                                                                                  | 1.3        | 1.3        | 1.1        | 1.0        | 1.2        | 1.2        | 1.1        | 1.1        |
| 4                                                                                  | 1.0        | 1.0        | 1.0        | 1.0        | 2.4        | 1.9        | 1.7        | 1.7        |
| 5                                                                                  | 1.3        | 1.2        | 1.1        | 1.0        | 1.1        | 1.1        | 1.1        | 1.1        |
| 6                                                                                  | 4.3        | 4.3        | 1.5        | 1.5        | 1.3        | 1.0        | 1.1        | 1.0        |
| 7                                                                                  | 1.0        | 1.2        | 1.0        | 1.2        | 1.2        | NA         | 1.5        | NA         |
| 8                                                                                  | 1.3        | 1.0        | 1.3        | 1.3        | 1.3        | NA         | 2.5        | 2.5        |
| 9                                                                                  | 1.3        | 1.4        | 1.4        | 1.0        | 1.5        | 1.0        | 1.5        | 1.0        |
| 10                                                                                 | 1.3        | 1.4        | 1.2        | 1.2        | 1.3        | 1.3        | 1.1        | 1.0        |
| <i>Epidural spinal cord stimulation, most rostral cathode site along the array</i> |            |            |            |            |            |            |            |            |
| 8                                                                                  | 1.6        | 1.0        | 1.4        | 1.1        | 1.6        | 1.8        | 2.3        | 1.6        |
| 9                                                                                  | 1.0        | 1.5        | 1.0        | 2.0        | 3.5        | 3.5        | 3.5        | 3.5        |
| 10                                                                                 | 1.6        | 1.4        | 1.6        | 1.0        | 1.6        | 1.0        | 1.6        | 1.0        |
| 11                                                                                 | 1.8        | 1.0        | 1.5        | 1.0        | 2.5        | 2.0        | 2.5        | 2.0        |
| 12                                                                                 | 1.0        | 1.0        | 1.0        | 1.0        | 1.5        | 1.5        | 1.5        | 1.5        |
| 13                                                                                 | 1.5        | 1.5        | 3.0        | 1.5        | 2.0        | 1.0        | 2.0        | 1.4        |
| 14                                                                                 | 1.2        | 1.0        | 1.2        | 1.0        | 1.2        | 1.0        | 1.2        | 1.1        |
| 15                                                                                 | 1.0        | 1.0        | 1.0        | 1.0        | 1.7        | 1.0        | 1.7        | 1.2        |
| 16                                                                                 | 1.3        | 1.3        | 1.0        | 1.3        | 1.0        | 1.3        | 1.2        | 1.3        |
| 17                                                                                 | 1.0        | 1.0        | 1.0        | 1.0        | 1.3        | 1.2        | 1.3        | 1.2        |
| <i>Epidural spinal cord stimulation, most caudal cathode site along the array</i>  |            |            |            |            |            |            |            |            |
| 8                                                                                  | 2.1        | 1.3        | 1.1        | 1.0        | 2.6        | 1.9        | 1.6        | 1.6        |
| 9                                                                                  | 1.3        | 1.3        | 1.3        | 1.0        | 1.3        | 1.0        | 1.3        | 1.0        |
| 10                                                                                 | 3.0        | 2.0        | 2.5        | 1.0        | 2.5        | 1.0        | 2.0        | 1.0        |
| 11                                                                                 | 3.0        | 1.8        | 2.0        | 1.0        | 3.0        | 1.0        | 1.3        | 1.0        |
| 12                                                                                 | 1.2        | 1.5        | 1.0        | 1.5        | 1.5        | 1.5        | 1.5        | 1.5        |
| 13                                                                                 | 4.0        | 2.0        | 4.0        | 2.0        | 2.0        | 1.0        | 1.8        | 1.0        |
| 14                                                                                 | 1.3        | 1.2        | 1.3        | 1.0        | 1.0        | 1.0        | 1.0        | 1.0        |
| 15                                                                                 | 1.5        | 1.5        | 1.5        | 1.0        | 1.0        | 1.0        | 1.0        | 1.0        |
| 16                                                                                 | 1.6        | 3.0        | 1.5        | 2.0        | 1.5        | 2.0        | 1.0        | 1.5        |
| 17                                                                                 | 1.1        | 1.3        | 1.0        | 1.0        | 1.3        | 1.3        | 1.0        | 1.3        |

EMG, electromyographic; right (R) and left (L) BF, biceps femoris; RF, rectus femoris; TA, tibialis anterior; and TS, triceps surae muscle group.
